# Supplementary material
Source: Springer Nature journal article supplement (https://www.springermedizin.de/resource/supplementary/12888_2012_1451_MOESM2_ESM.pdf/9480238)

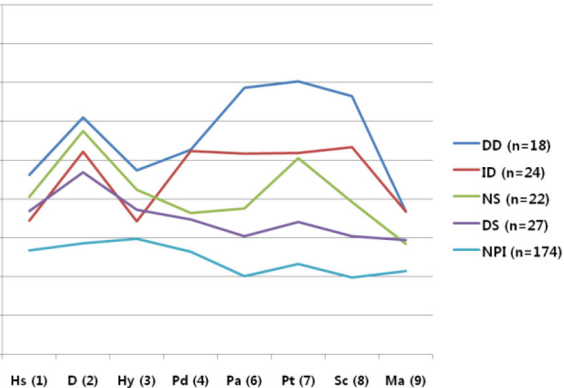

All Subjects

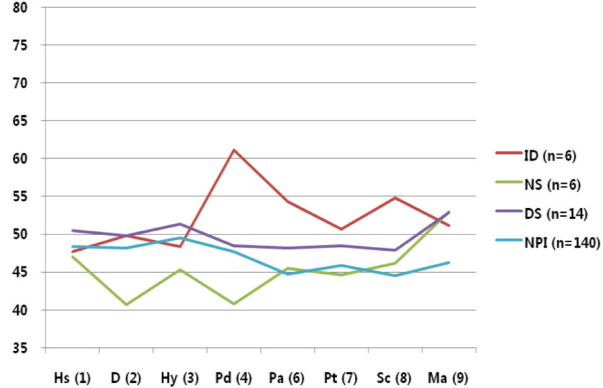

Non-patient

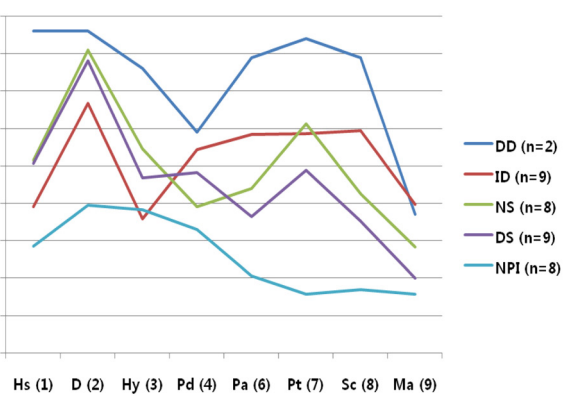

Depression

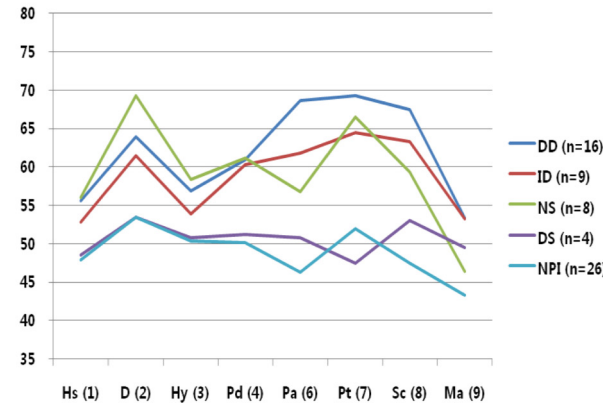

Schizophrenia

Supplement: MOESM2 [file 9480238]
